# Supplementary material for: Lymph nodes rather than pleural metabolic activity in 18F-FDG PET/CT correlates with malignant pleural effusion recurrence in advanced non-small cell lung cancer
Source: PubMed Central journal article supplement — Transl Lung Cancer Res. 2024 Sep 25;13(9):2236–53. doi: 10.21037/tlcr-24-291 (PMC11484712; doi:10.21037/tlcr-24-291), 2024-09-25
Supplement: tlcr-13-09-2236-dss.pdf [file tlcr-13-09-2236-dss.pdf]

## Data Sharing Statement

|                     |                                                                                                                                                     |                                                                                                                  |
|---------------------|-----------------------------------------------------------------------------------------------------------------------------------------------------|------------------------------------------------------------------------------------------------------------------|
| <b>Article Info</b> | <a href="https://dx.doi.org/10.21037/tlcr-24-291">https://dx.doi.org/10.21037/tlcr-24-291</a>                                                       |                                                                                                                  |
| <b>Item</b>         | <b>Question</b>                                                                                                                                     | <b>Authors' Response<br/>(place "-" if not applicable)</b>                                                       |
| 1                   | Would you like to share data collected for your study to others?                                                                                    | We could share data with reasonable request under the of approval of the first and corresponding authors         |
| 2                   | If not, would you like to share the reason for your decision?                                                                                       | -                                                                                                                |
| 3                   | What data in particular will be shared?                                                                                                             | The baseline characteristics and recurrence data of patients will be shared.                                     |
| 4                   | Any other documents will be shared? Such as study protocol, statistical analysis plan, informed consent form, clinical study report, analytic code. | Statistical analysis plan will be shared upon reasonable request.                                                |
| 5                   | When will data availability begin?                                                                                                                  | From the publication date.                                                                                       |
| 6                   | When will data availability end?                                                                                                                    | Two years within the publication date, since the technique may be updated over time.                             |
| 7                   | To whom will you share the data?                                                                                                                    | Medical oncologists and physician major in respiratory medicine.                                                 |
| 8                   | For what type of analysis or purpose?                                                                                                               | For analysis to explore the recurrence for lung adenocarcinoma patients with malignant pleural effusion.         |
| 9                   | How or where can the data/documents be obtained?                                                                                                    | Email could be sent to the address below to obtain shared data:<br>jiangyuxindr@163.com                          |
| 10                  | Any other restrictions?                                                                                                                             | We may balance the potential benefits and risks for each request and then provide the data that could be shared. |
