# Supplementary material for: Lymph nodes rather than pleural metabolic activity in 18F-FDG PET/CT correlates with malignant pleural effusion recurrence in advanced non-small cell lung cancer
Source: PubMed Central journal article supplement — Transl Lung Cancer Res. 2024 Sep 25;13(9):2236–53. doi: 10.21037/tlcr-24-291 (PMC11484712; doi:10.21037/tlcr-24-291), 2024-09-25
Supplement: tlcr-13-09-2236-supplementary.pdf [file tlcr-13-09-2236-supplementary.pdf]

**Table S1** Univariate and multivariate analyses of the factors associated with 300-day MPE recurrence for 148 EGFR-mutant treatment-naïve NSCLC patients with MPE at diagnosis

| Parameters                                 | Univariate Cox regression |         | Multivariate Cox regression |         |
|--------------------------------------------|---------------------------|---------|-----------------------------|---------|
|                                            | HR (95% CI)               | P value | HR (95% CI)                 | P value |
| Age                                        | 1.00 (0.98–1.02)          | 0.925   | 1.20 (0.45–3.20)            | 0.984   |
| Gender (female)                            | 0.77 (0.46–1.29)          | 0.319   | 0.64 (0.37–1.12)            | 0.117   |
| ECOG PS $\geq$ 2                           | 1.34 (0.88–2.03)          | 0.173   | 1.19 (0.76–1.87)            | 0.450   |
| Liver metastases                           | 1.61 (0.73–3.55)          | 0.238   | 1.51 (0.58–3.92)            | 0.395   |
| Bone metastases                            | 1.33 (0.79–2.24)          | 0.278   | 1.44 (0.78–2.66)            | 0.242   |
| Contralateral lung metastases              | 0.84 (0.41–1.71)          | 0.637   | 0.83 (0.39–1.80)            | 0.644   |
| Brain metastases                           | 1.05 (0.53–2.07)          | 0.888   | 0.95 (0.44–2.04)            | 0.893   |
| Adrenal gland metastases                   | 1.15 (0.41–3.16)          | 0.793   | 0.99 (0.34–2.88)            | 0.986   |
| Combined systemic treatment within 30 days |                           |         |                             |         |
| With chemotherapy                          | 0.25 (0.09–0.69)          | 0.007   | 0.21 (0.07–0.62)            | 0.005   |
| With antiangiogenic therapy                | 0.95 (0.23–3.90)          | 0.943   | 1.73 (0.38–7.87)            | 0.475   |
| MPE control measurements within 30 days    |                           |         |                             |         |
| Indwelling pleural catheter                | 1.05 (0.48–2.31)          | 0.893   | 1.20 (0.45–3.20)            | 0.712   |
| Intrapleural perfusion                     | 1.15 (0.67–1.96)          | 0.613   | 0.98 (0.56–1.72)            | 0.952   |
| EGFR-activating mutations                  |                           |         |                             |         |
| Exon 19 deletion                           | Ref.                      |         | Ref.                        |         |
| Exon 21 mutation                           | 1.09 (0.64–1.86)          | 0.743   | 1.08 (0.60–1.95)            | 0.804   |
| Unknown                                    | 1.40 (0.49–3.98)          | 0.530   | 1.15 (0.35–3.77)            | 0.812   |
| Generation of TKI                          |                           |         |                             |         |
| First-generation                           | Ref.                      |         | Ref.                        |         |
| Second-generation                          | 0.90 (0.32–2.51)          | 0.842   | 1.10 (0.36–3.37)            | 0.870   |
| Third-generation                           | 0.71 (0.38–1.35)          | 0.302   | 0.84 (0.41–1.70)            | 0.623   |

MPE, malignant pleural effusion; EGFR, epidermal growth factor receptor; NSCLC, non-small cell lung cancer; ECOG PS, Eastern Cooperative Oncology Group performance status; TKI, tyrosine kinase inhibitor; HR, hazard ratio; CI, confidence interval; Ref., reference.

**Table S2** The RSF model and Cox regression model for predicting recurrence-free survival

| Time of prediction | Models    | tAUC (95% CI)       | P value <sup>†</sup> |
|--------------------|-----------|---------------------|----------------------|
| 100 days           | RSF model | 81.49 (72.09–90.88) | Reference            |
|                    | Cox model | 81.18 (71.73–90.63) | 0.881                |
| 300 days           | RSF model | 83.03 (73.43–92.63) | Reference            |
|                    | Cox model | 83.29 (73.95–92.62) | 0.894                |
| 600 days           | RSF model | 86.66 (77.01–96.31) | Reference            |
|                    | Cox model | 87.37 (78.57–96.17) | 0.685                |
| 900 days           | RSF model | 89.90 (81.64–98.16) | Reference            |
|                    | Cox model | 89.65 (81.29–98.00) | 0.768                |

<sup>†</sup>, Delong test comparing the RSF model to the LASSO model at different time points. RSF, random survival forest; tAUC, time-dependent area under the curve; CI, confidence interval.

**Table S3** Univariate and multivariate analyses of the factors for the first MPE recurrence requiring intervention within follow-up in NSCLC patients with actionable mutation

| Parameters                                     | Univariate Cox regression |         | Multivariate Cox regression |         |
|------------------------------------------------|---------------------------|---------|-----------------------------|---------|
|                                                | HR (95% CI)               | P value | HR (95% CI)                 | P value |
| <b>Clinical parameters</b>                     |                           |         |                             |         |
| Age                                            | 1.00 (0.97–1.04)          | 0.798   | –                           | –       |
| Gender (female)                                | 0.48 (0.21–1.14)          | 0.098   | –                           | –       |
| ECOG PS $\geq$ 2                               | 0.93 (0.12–6.96)          | 0.941   | –                           | –       |
| Stage IVB                                      | 2.89 (1.10–7.58)          | 0.031   | 8.46 (2.35–30.41)           | 0.001   |
| Liver metastases                               | 0.79 (0.11–5.97)          | 0.821   | –                           | –       |
| Bone metastases                                | 2.65 (1.11–6.34)          | 0.028   | –                           | –       |
| Contralateral lung metastases                  | 0.65 (0.15–2.81)          | 0.564   | –                           | –       |
| Brain metastases                               | 1.06 (0.25–4.60)          | 0.936   | –                           | –       |
| Adrenal gland metastases                       | 0.45 (0.06–3.36)          | 0.434   | –                           | –       |
| <b>MPE control measurements within 30 days</b> |                           |         |                             |         |
| Indwelling pleural catheter                    | 1.90 (0.44–8.23)          | 0.388   | –                           | –       |
| Intrapleural perfusion                         | 2.13 (0.78–5.83)          | 0.141   | –                           | –       |
| <b>Qualitative parameters</b>                  |                           |         |                             |         |
| Primary lesion adjacent to pleura              | 0.47 (0.17–1.28)          | 0.140   | –                           | –       |
| Pleural FDG uptake (+)                         | 1.01 (0.37–2.77)          | 0.981   | –                           | –       |
| <b>Pleural FDG uptake pattern</b>              |                           |         |                             |         |
| Encasement                                     | 1.64 (0.38–7.20)          | 0.510   | –                           | –       |
| Nodular                                        | 1.58 (0.61–4.10)          | 0.344   | –                           | –       |
| Linear                                         | 0.68 (0.26–1.75)          | 0.419   | –                           | –       |
| <b>Quantitative parameters</b>                 |                           |         |                             |         |
| LN SUV <sub>max</sub> >4.50 g/mL               | 3.73 (1.25–11.19)         | 0.019   | 4.26 (1.24–14.65)           | 0.022   |
| N1 SUV <sub>max</sub> >3.07 g/mL               | 2.79 (1.07–7.29)          | 0.036   | –                           | –       |
| N2 SUV <sub>max</sub> >3.84 g/mL               | 1.94 (0.81–4.66)          | 0.136   | –                           | –       |
| N3 SUV <sub>max</sub> >4.52 g/mL               | 2.26 (0.74–6.91)          | 0.154   | –                           | –       |
| Pleural SUV <sub>max</sub> >2.17 g/mL          | 0.89 (0.37–2.15)          | 0.793   | –                           | –       |
| Pleural MTV >18.00 mL                          | 0.78 (0.30–2.03)          | 0.607   | –                           | –       |
| Pleural TLG >30.32 g                           | 0.78 (0.32–1.92)          | 0.595   | –                           | –       |
| Primary SUV <sub>max</sub> >11.09 g/mL         | 0.70 (0.29–1.69)          | 0.433   | –                           | –       |
| <b>Pleural fluid parameters</b>                |                           |         |                             |         |
| p-CEA >15.6 $\mu$ g/L                          | 0.83 (0.27–2.49)          | 0.733   | –                           | –       |
| p-LDH >786 U/L                                 | 1.93 (0.76–4.92)          | 0.169   | –                           | –       |
| p-Glucose >6.9 mmol/L                          | 1.75 (0.70–4.37)          | 0.227   | –                           | –       |

MPE, malignant pleural effusion; NSCLC, non-small cell lung cancer; ECOG PS, Eastern Cooperative Oncology Group performance status; FDG, <sup>18</sup>F-fluorodeoxyglucose; LN, lymph nodes; SUV<sub>max</sub>, maximum standardized uptake value; MTV, metabolic tumor volume; TLG, total lesion glycolysis; p-CEA, pleural fluid carcinoma embryonic antigen; p-LDH, pleural fluid lactate dehydrogenase; HR, hazard ratio; CI, confidence interval.
